# Supplementary material for: Inhibition of oxygen release and stabilization of the bulk structure of lithium-rich layered oxides by strong Mo–O covalent binding
Source: Royal Society of Chemistry journal article supplement (doi:10.1039/d3ta05649j), 2023-12-01
Supplement: d3ta05649j1.pdf [file d3ta05649j1.pdf]

## Supplementary Information

### Inhibit oxygen release and stabilize bulk structure of lithium-rich layered oxides by strong Mo-O covalent binding

Huinan Yu<sup>a</sup>, Zhichen Xue<sup>a</sup>, Zhiyuan Xue<sup>a</sup>, Zhongyuan Luo<sup>a</sup>, Chenxi Ding<sup>a</sup>, Guorong Hu<sup>a,b,c</sup>, Zhongdong Peng<sup>a,b,c</sup>, Yanbing Cao<sup>a,b,c</sup>, Ke Du<sup>a,b,c,\*</sup>

<sup>a</sup> *School of Metallurgy and Environment, Central South University, Changsha, 410083, China*

<sup>b</sup> *Engineering Research Center of the Ministry of Education for Advanced Battery Materials, Central South University, Changsha, 410083, China*

<sup>c</sup> *Hunan Provincial Key Laboratory of Nonferrous Value-added Metallurgy, Central South University, Changsha, 410083, China*

\*Corresponding author. Ke Du  
*E-mail address: dukecsu@163.com*

#### 1. Supplementary tables

**Table S1.** Rietveld Refinement Results of LRP and LR-Mo1.0.

| Sample   | a=b (Å) | c (Å)    | c/a    | V (Å) <sup>3</sup> | Rwp   | Rp    | $\chi^2$ |
|----------|---------|----------|--------|--------------------|-------|-------|----------|
| LRP      | 2.85627 | 14.26103 | 4.9929 | 100.758            | 2.03% | 1.40% | 2.037    |
| LR-Mo1.0 | 2.85323 | 14.23955 | 4.9907 | 100.392            | 1.77% | 1.25% | 2.396    |

**Table S2.** Fitting Result of Equivalent Circuit from Nyquist Curves for LRP and LR-Mo1.0.

| Samples  | $R_s/\Omega$ | $R_{ct}/\Omega$ | $\sigma/\Omega \text{ cm}^2 \text{ s}^{-1/2}$ | $D_{\text{Li}^+}/\text{cm}^2 \text{ s}^{-1}$ |
|----------|--------------|-----------------|-----------------------------------------------|----------------------------------------------|
| LRP      | 4.026        | 100.8           | 165.9                                         | $8.96 \times 10^{-16}$                       |
| LR-Mo1.0 | 2.777        | 65.1            | 78.7                                          | $3.98 \times 10^{-15}$                       |

## 2. Supplementary figures

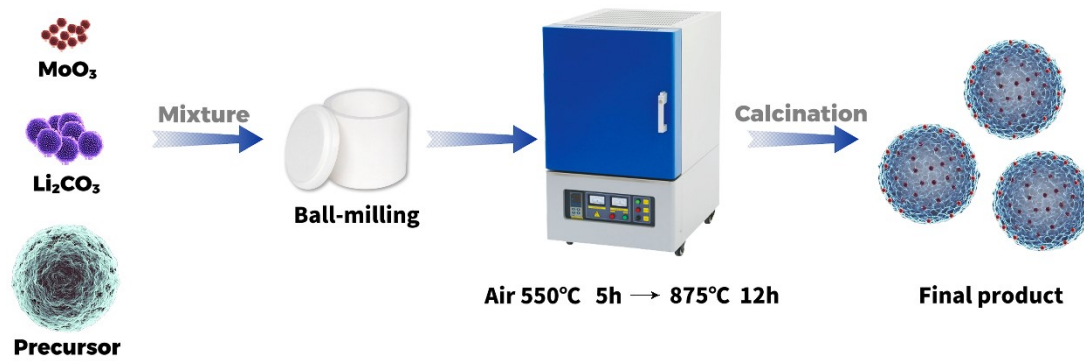

**Fig. S1.** Schematic diagram of material synthesis

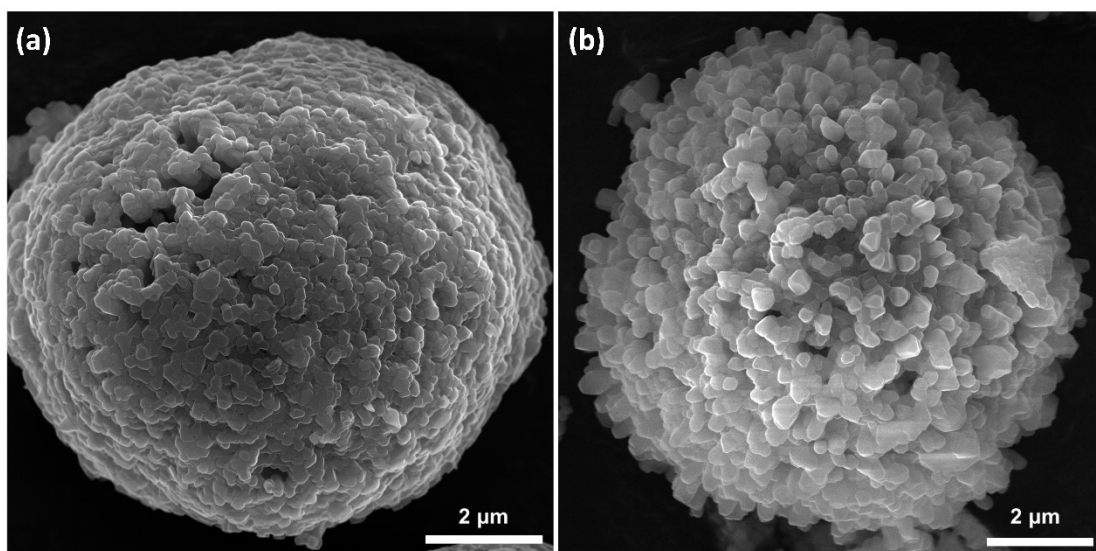

**Fig. S2.** SEM images of (a)LR-Mo0.5 and (b)LR-Mo1.5

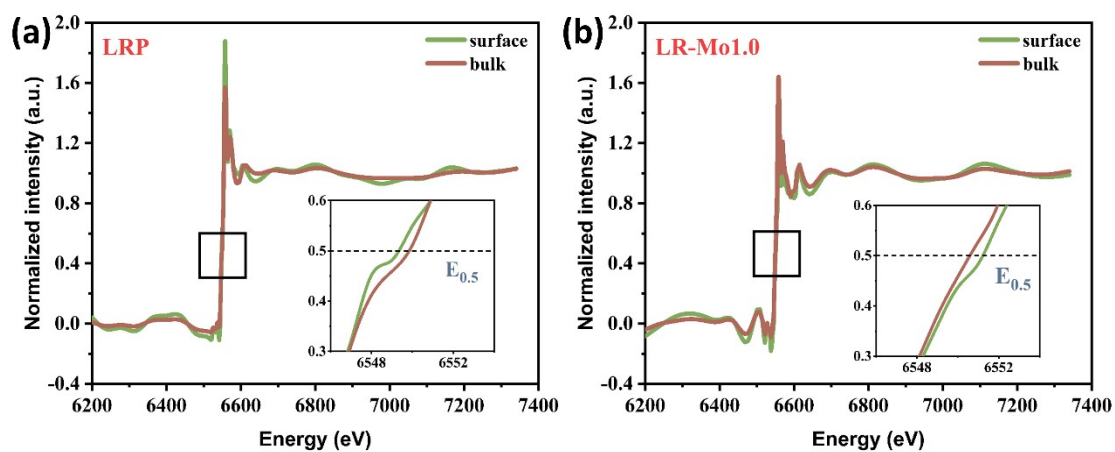

**Fig. S3.** Mn K-edge XANES of selected surface and bulk regions of (a)LRP and (b)LR-Mo1.0

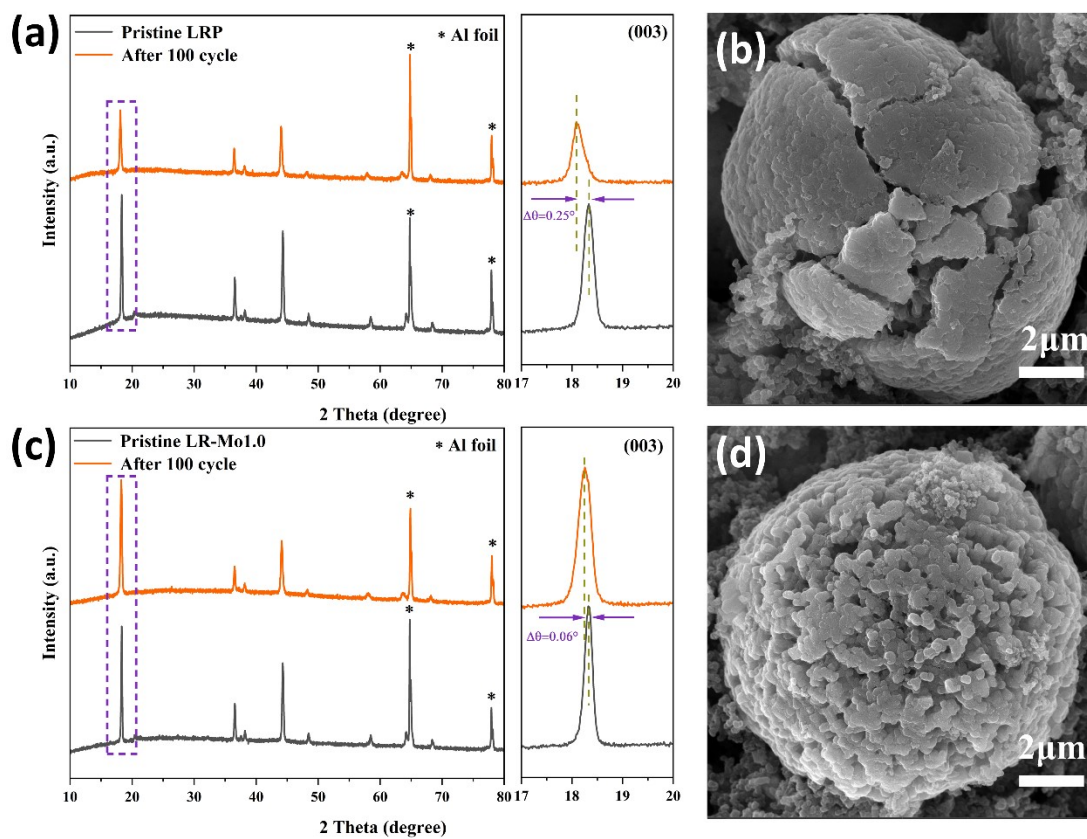

**Fig.S4. XRD patterns and SEM images of (a, b) LRP and (c, d) LR-Mo1.0 after 100 cycles at 1C**
